# Supplementary material for: Mimicking the extracellular matrix by incorporating functionalized graphene into hybrid hydrogels
Source: Royal Society of Chemistry journal article supplement (doi:10.1039/d3nr02689b), 2023-01-01
Supplement: d3nr02689b1.pdf [file d3nr02689b1.pdf]

## SUPPORTING INFORMATION

### Mimicking the extracellular matrix by incorporating functionalized graphene into hybrid hydrogels

Josué M. Galindo,<sup>a</sup> Irene San-Millán,<sup>a</sup> Carlos A. Castillo-Sarmiento,<sup>b</sup> Inmaculada Ballesteros-Yáñez,<sup>c</sup> M. Antonia Herrero,<sup>\*a</sup> Sonia Merino,<sup>\*a</sup> and Ester Vázquez <sup>\*a</sup>

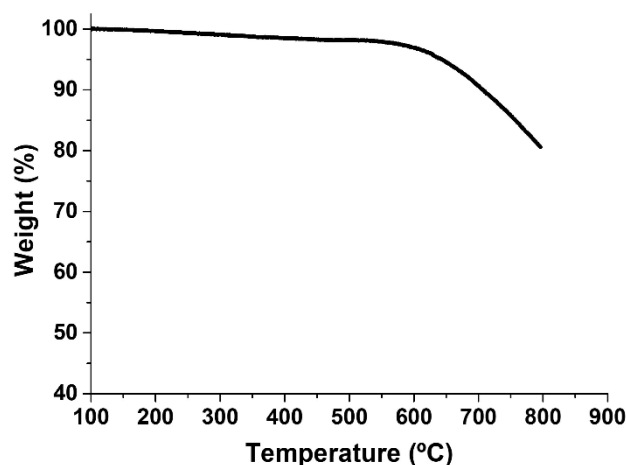

Figure S1. TGA analysis of FLG.

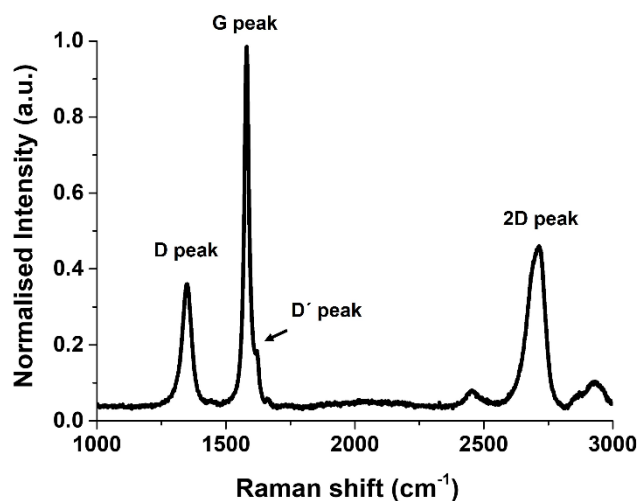

Figure S2. Raman spectra of FLG.

#### CALCULATION OF FLG LAYERS:

To obtain the number of layers in the graphene, the next equation is used:

$$N_G = 10^{0.84M+0.45M^2} \quad (\text{Eq. 1})$$

Where M is equal to:

$$M = \frac{I_{G'ene}(\omega = \omega_{p,G'ite})/I_{G'ene}(\omega = \omega_{s,G'ite})}{I_{G'ite}(\omega = \omega_{p,G'ite})/I_{G'ite}(\omega = \omega_{s,G'ite})} \quad (\text{Eq. 2})$$

Where  $I_{G'_{ene}}$  and  $I_{G'_{ite}}$  correspond with the intensity of  $G'$  band for graphene and for graphene and graphite, respectively.

Thus, in our sample:

$$M = \frac{0.4196/0.3772}{0.46658/0.24872} = 0.5929914 \rightarrow N_G = 10^{0.84 \cdot 0.5929914 + 0.45 \cdot 0.5929914^2} = 4$$

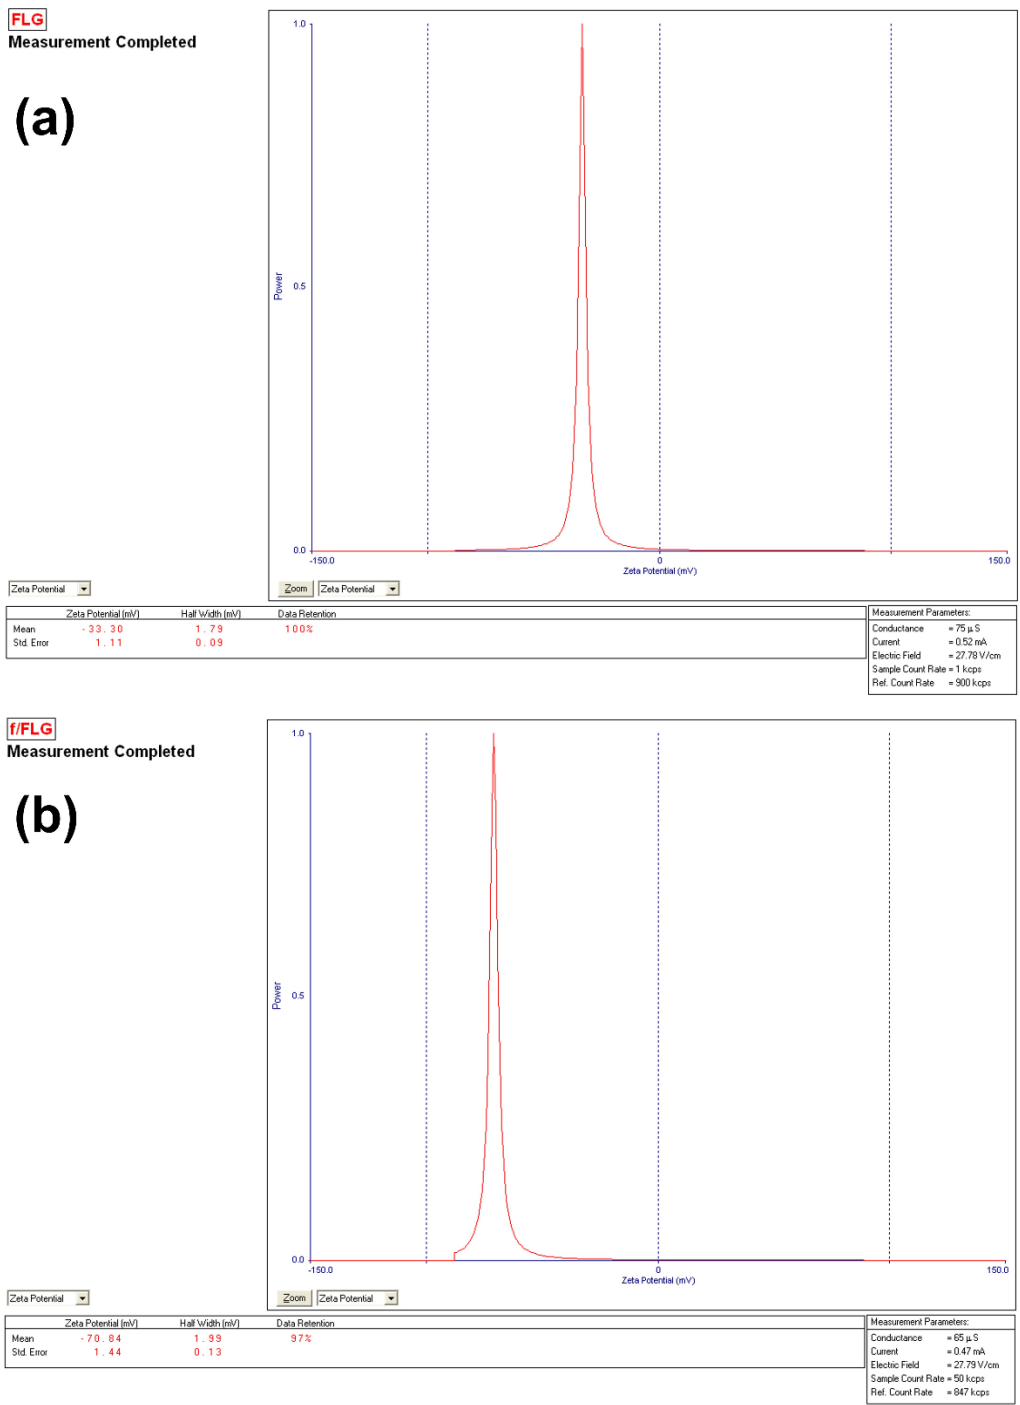

**Figure S3.** Z-potential of **(a)** FLG and **(b)** f-FLG.
